# Supplementary material for: Exceptional peroxidase-like activity of an iron and copper based organic framework nanosheet for consecutive colorimetric biosensing of glucose and kanamycin in real food samples
Source: Royal Society of Chemistry journal article supplement (doi:10.1039/d3an01242e), 2023-01-01
Supplement: d3an01242e1.pdf [file d3an01242e1.pdf]

## **Exceptional Peroxidase-Like activity of an Iron and Copper based organic framework for Consecutive Colorimetric Biosensing of Glucose and Kanamycin in Real Food Sample**

**Rajakumari Jesuraj <sup>a</sup>, Arunjegan Amalraj <sup>a</sup>, Vinoth Kumar Vaidyanathan <sup>b</sup> and Panneerselvam Perumal <sup>a\*</sup>**

<sup>a</sup> Department of Chemistry, SRM Institute of Science and Technology, Kattankulathur, 603 203, Tamil Nadu, India.

<sup>b</sup> Integrated Bioprocessing Laboratory, Department of Biotechnology, School of Bioengineering, Faculty of Engineering and Technology, SRM Institute of Science and Technology (SRM IST), Kattankulathur, Chengalpattu District, Tamil Nadu, 603203, India

\* Corresponding Author-Dr. Panneerselvam Perumal- Department of Chemistry, SRM Institute of Science and Technology, Kattankulathur, 603 203, Tamil Nadu, India; E-mail: [panneerp1@srmist.edu.in](mailto:panneerp1@srmist.edu.in); [panneerchem82@gmail.com](mailto:panneerchem82@gmail.com); Phone: +91 9688538842; ORCID: <https://orcid.org/0000-0003-2647-6835>.

We did an experiment of peroxidase catalytic activity for FeCu-MOF with different peroxidase substrates such as OPDA and ABTS in the presence of  $H_2O_2$  and form an oxidized OPDA and ABTS. Nevertheless, the FeCu-MOF +  $H_2O_2$  system with TMB gives oxidation of TMB produced an Blue color, while in the presence of OPDA produced oxidized OPDA with orange color and ABTS gives oxidized ABTS and produced a green color. Moreover, OPDA and ABTS having some disadvantages when compared to TMB. The OPDA is less stability easily oxidized with an hour in room temperature and ABTS is slow oxidizing peroxidase substrate, expensive, poor stability and so on. To overcome these drawbacks we choose TMB as a peroxidase substrate for our sensor.

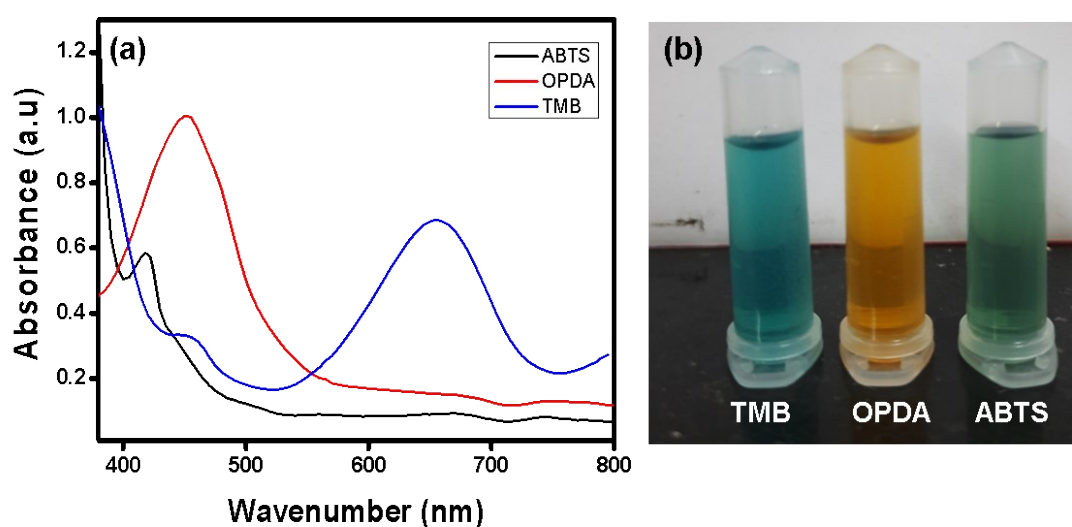

**Figure S1.** (a&b) Peroxidase-like activity of FeCu-MOF NS with TMB, OPDA and ABTS.

## Kinetic analysis of FeCu-MOF nanozyme

Kinetics studies were accomplished by determining the  $A_{654}$  nm with respect to reaction time. The peroxidase-like catalytic performance of FeCu MOF with  $H_2O_2$  and TMB as substrates was measured using steady-state kinetics. The standard kinetic parameters including Michaelis–Menten constant ( $K_m$ ) as well as the maximum reaction velocity ( $V_{max}$ ) for FeCu-MOF nanozyme were calculated via Lineweaver–Burk double reciprocal equation (1).

$$\frac{1}{V} = \frac{K_m}{V_{max}} \frac{1}{[S]} + \frac{1}{V_{max}} \quad (1)$$

Where,  $V$  is the initial velocity,  $V_{max}$  represents the maximal reaction velocity,  $K_m$  is the Michaelis constant and  $[S]$  represents the concentration of substrate [4]. The  $K_m$  value and the  $V_{max}$  value of the FeCu-MOF nanozyme have been given in Table 1. Here, the  $K_m$  value indicates the affinity of the enzyme to the substrate and  $V_{max}$  indicates a catalytic activity of the enzyme. The  $K_m$  value of FeCu-MOF using TMB as the substrate is close to HRP. Simultaneously, the  $K_m$  value of FeCu-MOF using  $H_2O_2$  as the substrate is much lower than the individual catalyst and HRP, which demonstrates that FeCu-MOF have superior affinity to  $H_2O_2$ . The higher  $V_{max}$  value of the FeCu-MOF shows high catalytic activity. Furthermore, the efficiency of the FeCu-MOF has been demonstrated by evaluating the obtained  $K_m$  value and  $V_{max}$  value with different previously reported enzymes.

**Table S1.** Comparison of  $K_m$  and  $V_{max}$  with other previously reported literature

| Catalyst    | Substrate | $K_m$ (mM) | $V_{max}$                         | Reference |
|-------------|-----------|------------|-----------------------------------|-----------|
| HRP         | TMB       | 0.275      | $1.24 (10^{-8} \text{ Ms}^{-1})$  | [1]       |
|             | $H_2O_2$  | 0.214      | $2.46 (10^{-8} \text{ Ms}^{-1})$  |           |
| Cu-MOF      | TMB       | 0.456      | $2.478 (10^{-8} \text{ Ms}^{-1})$ | [2]       |
|             | $H_2O_2$  | 28.58      | $5.45 (10^{-8} \text{ Ms}^{-1})$  |           |
| 2D Fe-BTC   | TMB       | 0.2610     | $7.95 (10^{-8} \text{ Ms}^{-1})$  | [3]       |
|             | $H_2O_2$  | 0.0334     | $2.65(10^{-8} \text{ Ms}^{-1})$   |           |
| $CuFe_2O_4$ | TMB       | 2.26       | $2.07(10^{-8} \text{ Ms}^{-1})$   | [4]       |
|             | $H_2O_2$  | 0.50       | $2.61(10^{-8} \text{ Ms}^{-1})$   |           |
| FeCu-MOF NS | TMB       | 0.286      | $8.17(10^{-8} \text{ Ms}^{-1})$   | This work |
|             | $H_2O_2$  | 0.30       | $2.68(10^{-8} \text{ Ms}^{-1})$   |           |

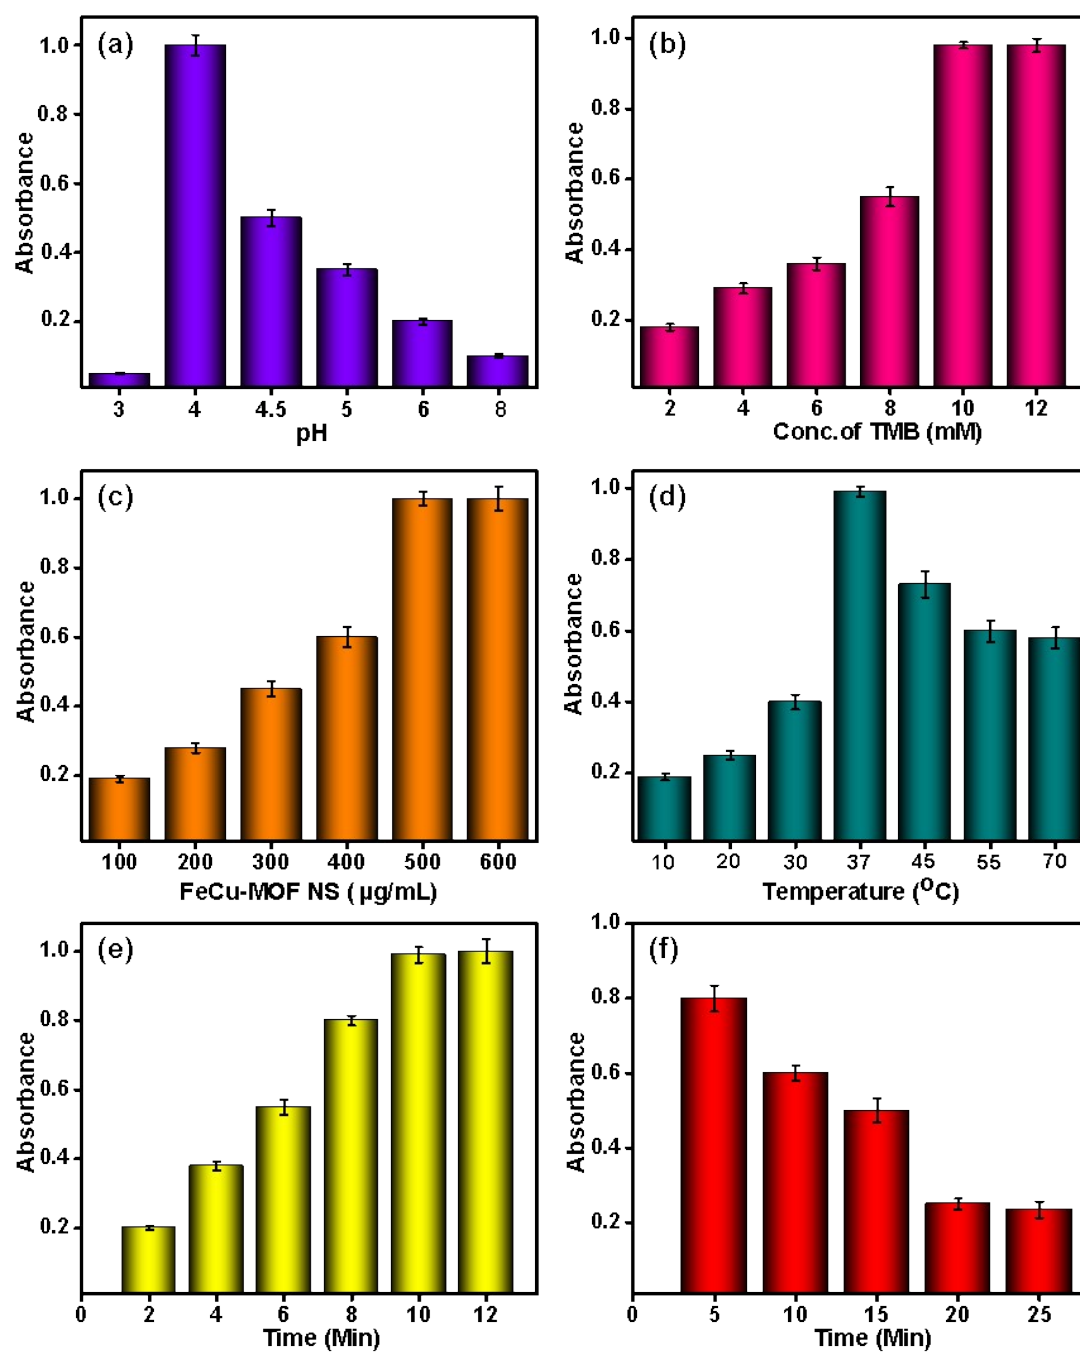

**Figure S2.** Optimization of (a) incubation of pH (b) concentration of TMB (c) amount of FeCu-MOF NS (d) incubation temperature (e-f) sensing time of glucose and KAN.

**Table S2.** Comparison of the proposed glucose sensor with other reported methods

| Sensing Method | Sensing Probe          | Linear Range            | LOD           | Reference |
|----------------|------------------------|-------------------------|---------------|-----------|
| CM             | Au-PtNCs-GMP           | 0.05–0.4 mM             | 11 $\mu$ M    | [5]       |
| CM             | Ba-hemin@GOX           | 9.25 $\mu$ M to 0.74 mM | 3.083 $\mu$ M | [6]       |
| CM             | Fe-COF                 | 5 to 350 $\mu$ M        | 1.0 $\mu$ M   | [7]       |
| CM             | COF <sub>HD</sub> –GOx | 0.005 to 2 mM           | 0.54 $\mu$ M  | [8]       |
| CM             | FeCu-MOF NS            | 0.25-1 mM               | 0.1 $\mu$ M   | This work |

**Table S3.** Comparison of the proposed KAN sensor with other reported method

| Sensing Method | Sensing Probe   | Linear Range              | LOD      | Reference |
|----------------|-----------------|---------------------------|----------|-----------|
| CM             | OFL-Ti-MN       | 15.28 nM to 46.14 $\mu$ M | 15.28 nM | [9]       |
| FM             | UCNPs-BHQ3-cDNA | 0.05–50 $\mu$ M           | 18.90 nM | [10]      |
| FM             | DNA Cu/Ag NCs   | 80 nM-10 $\mu$ M          | 13.3 nM  | [11]      |
| FM             | FDNA-QDNA       | 100-600 nM                | 13.52 nM | [12]      |
| CM             | FeCu-MOF NS     | 0.020-0.1 $\mu$ M         | 8 nM     | This work |

We looked a selectivity analysis for kanamycin with sugar, ions and amino acids (**Figure S3a**). However, sugars and ions does not interfere with the detection of kanamycin. Meanwhile, amino acids have a minor interference but it takes double the time compared to detection time of kanamycin so it's negligible. However, the minor interference also prohibited by using NEM masking agent as shown in **Figure S3b**.

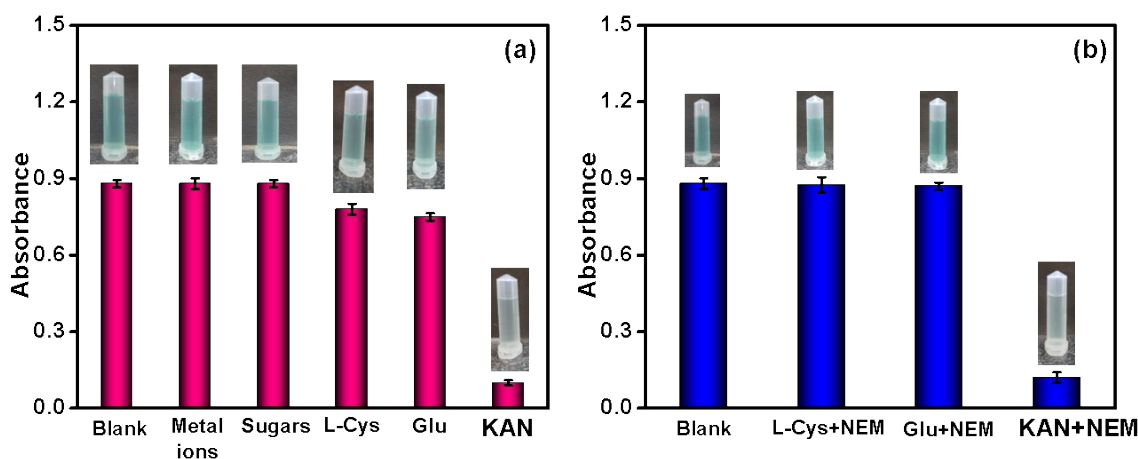

**Figure S3.** Selectivity analysis for kanamycin with sugar, ions and amino acids.

#### Reference

1. Y. Song, K. Qu, C. Zhao, J. Ren and X. Qu, *Advanced Materials*, 2010, **22**, 2206–2210.
2. H. Yu, H. Wu, X. Tian, Y. Zhou, C. Ren, Z. Wang, *RSC advances*, 2021, **11(43)**, 26963-73.
3. A. Yuan, Y. Lu, X. Zhang, Q. Chen, Y. Huang, *Journal of Materials Chemistry B*, 2020, **8(40)**, 9295-303.
4. Xia, F., Shi, Q., & Nan, Z., *Dalton Transactions*, 2020, **49(36)**, 12780-12792.
5. H. Sun, J. Zhang, M. Wang, X. Su, *Microchemical Journal*, 2022, **179**, 107574.
6. J. Yi, X. Han, F. Gao, L. Cai, Y. Chen, X. Deng, X. Li, J. Xue, H. Zhou, *RSC advances*, 2022, **12(32)**, 20544-9.
7. J. Wang, X. Yang, T. Wei, J. Bao, Q. Zhu, Z. Dai, *ACS Applied Bio Materials*, 2018, **1(2)**, 382-8.
8. J.Y. Yue, X.L. Ding, L. Wang, R. Yang, J.S. Bi, Y.W. Song, Yang P, Ma Y, Tang B, *Materials Chemistry Frontiers*, 2021, **5(10)**, 3859-66.
9. W. Wang, Y. Yin, S. Gunasekaran, *Biosensors and Bioelectronics*, 2022, **218**, 114774.

10. Y. Zhang, R. Liu, M.M. Hassan, H. Li, Q. Ouyang, Q. Chen, *Spectrochimica Acta Part A: Molecular and Biomolecular Spectroscopy*. 2021, **262**, 120147.
11. Y. Liu, B. Guan, Z. Xu, Y. Wu, Y. Wang, G. Ning, *Spectrochimica Acta Part A: Molecular and Biomolecular Spectroscopy*, 2023, **286**, 121953.
12. X. Ma, S. Qiao, H. Sun, R. Su, C. Sun, M. Zhang, *Frontiers in Chemistry*. 2019, **7**, 29.
